# Supplementary material for: Identification of Novel Antimicrobial Resistance Genes Using Machine Learning, Homology Modeling, and Molecular Docking
Source: MDPI journal article supplement (doi:10.3390/microorganisms10112102), 2022-10-23
Supplement: s1 [file s1]

(A) Ligand Docking, Ertapenem

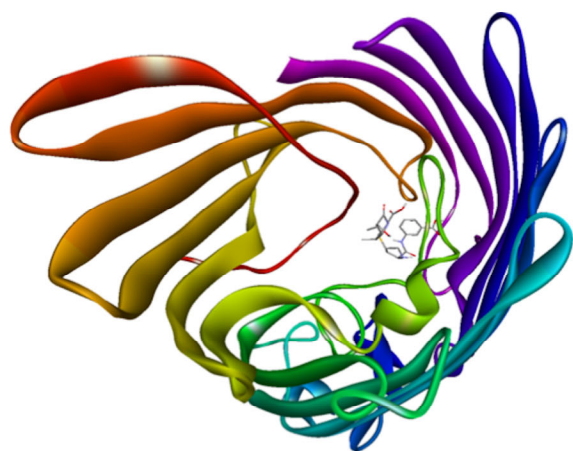

(B) 2D Interaction Model, Ertapenem

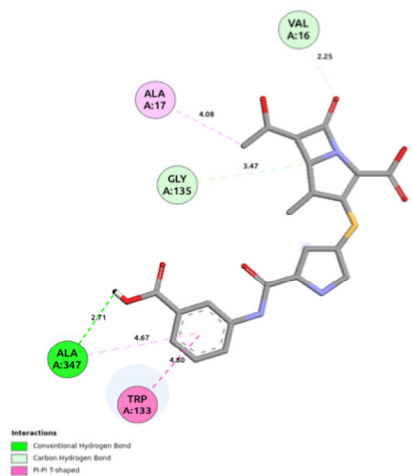

(C) Receptor-Ligand Complex, Imipenem

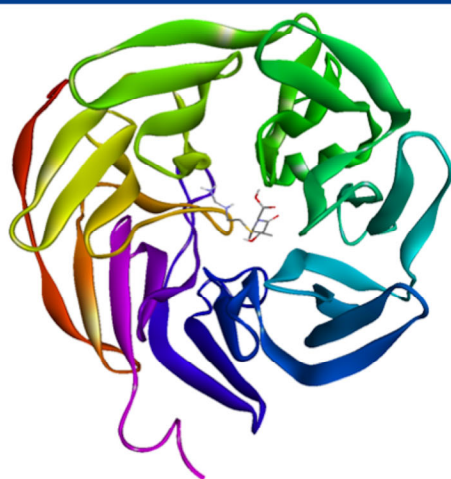

(D) Pocket Interaction, Imipenem

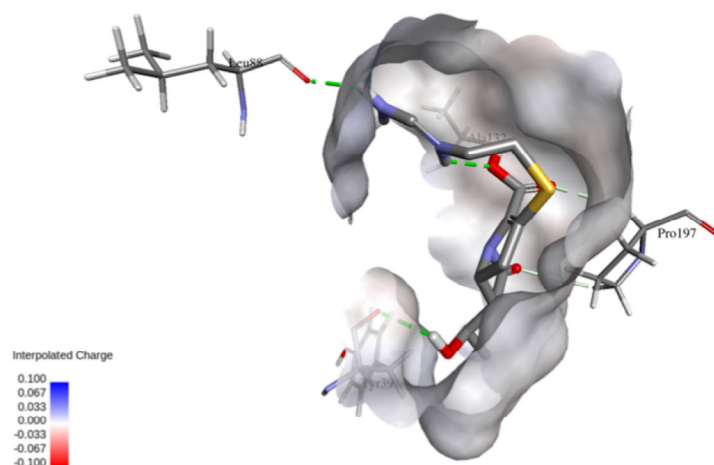

(E) Pocket Interaction, Meropenem

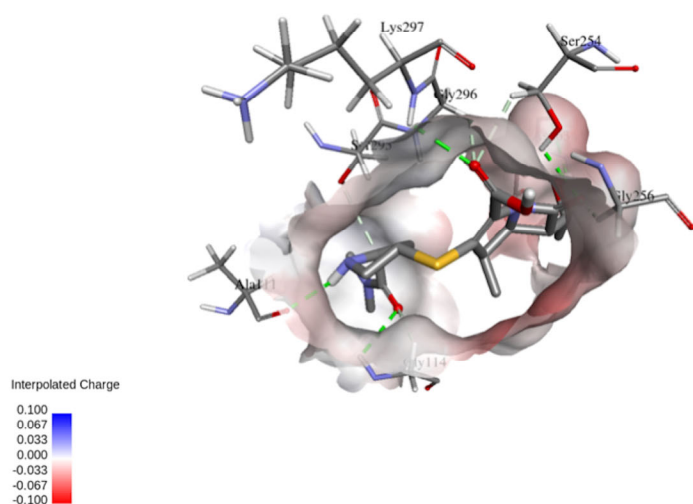

(F) 2D Interaction Model, Meorpenem

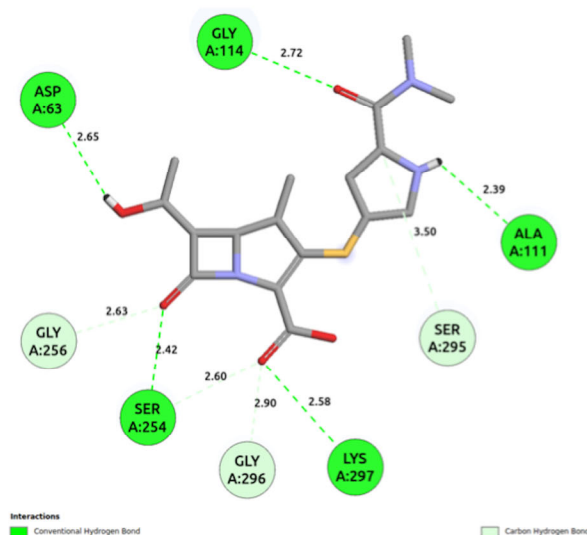

**Supplementary Figure 6.** Homology modeling docking of novel AMR genes predicted for *K. pneumoniae* for antibiotics (Ertapenem, Imipenem, and Meropenem). **6a.** Receptor (WP\_049116479.1) and ligand (Ertapenem) complex. **6b.** 2D interaction model for receptor (WP\_049116479.1) and ligand (Ertapenem). **6c.** Receptor (WP\_064146913.1) and ligand (Imipenem) complex. **6d.** Pocket interaction for receptor (WP\_064146913.1) and ligand (Imipenem). **6e.** Pocket Interaction for receptor (WP\_125961907.1) and ligand (Meropenem). **6f.** 2D Interaction Model for receptor (WP\_125961907.1) and ligand (Meropenem).
