# Supplementary material for: Identification of Novel Antimicrobial Resistance Genes Using Machine Learning, Homology Modeling, and Molecular Docking
Source: MDPI journal article supplement (doi:10.3390/microorganisms10112102), 2022-10-23
Supplement: s1 [file s1]

(A) Surface Model

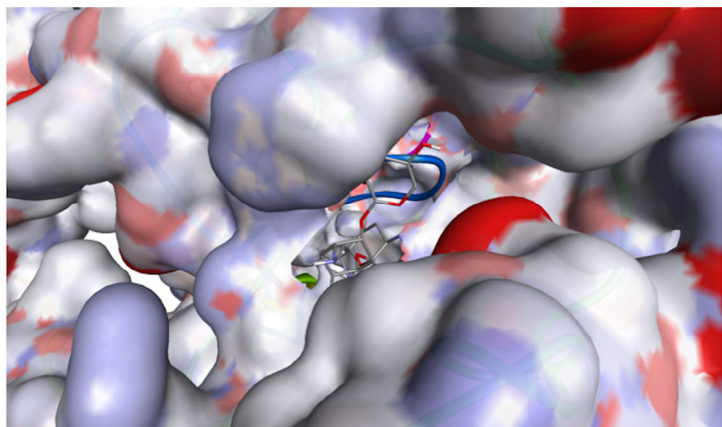

(B) Pocket Interaction Model for Gentamicin

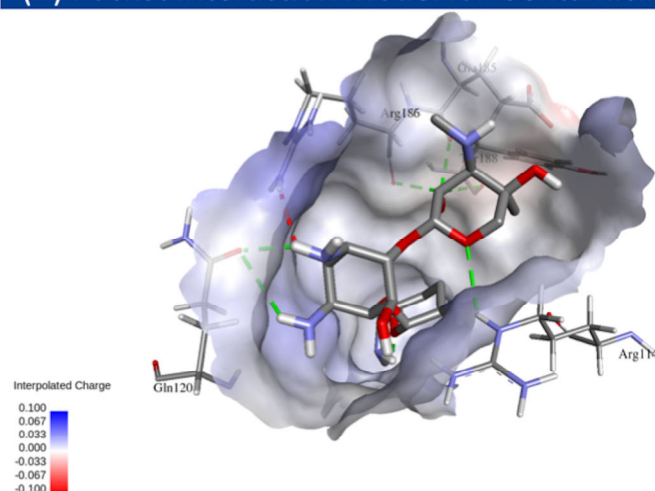

(C) Protein Ligand Complex, Kanamycin

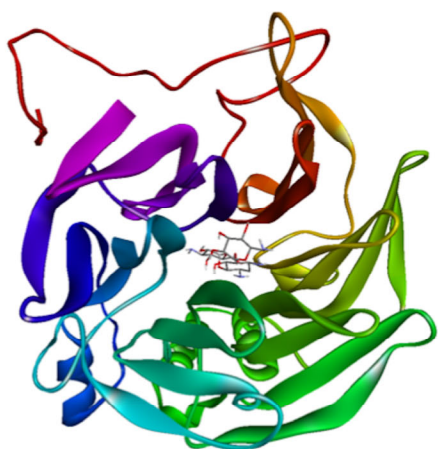

(D) 2D Model Interaction, Kanamycin

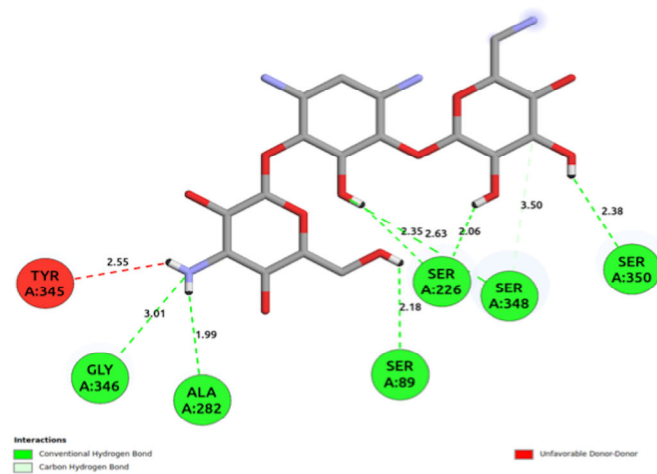

(E) Pocket Interactions, Streptomycin

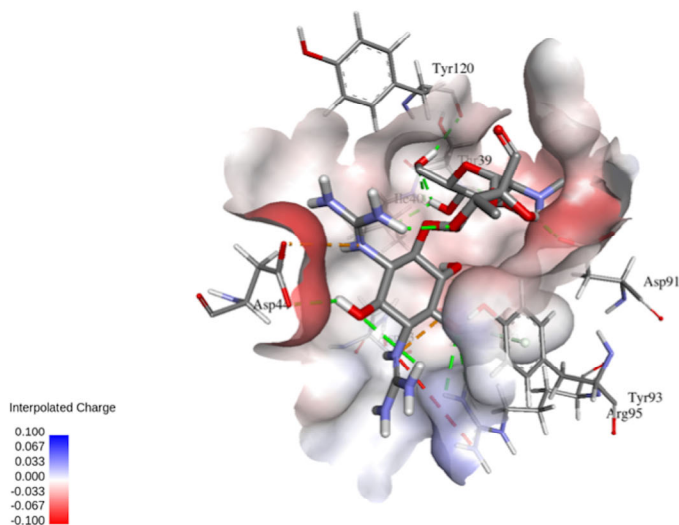

(F) 2D Interaction Model, Streptomycin

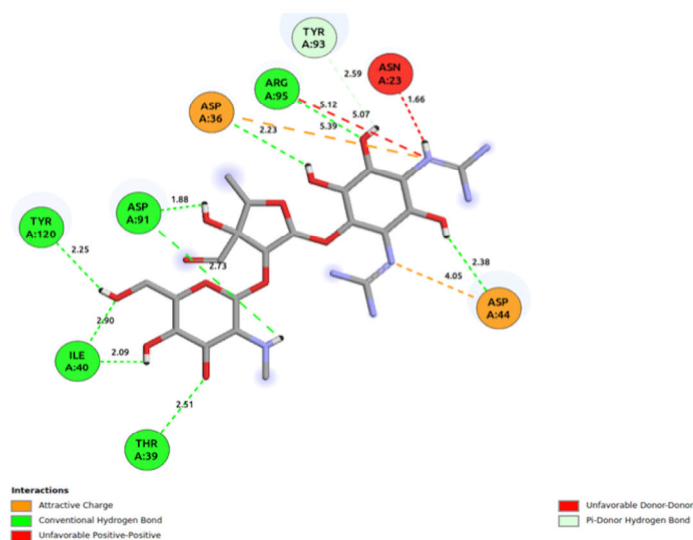

**Supplementary Figure 10.** Homology modeling docking of novel AMR genes predicted for *S. enterica* for antibiotics (Gentamicin, Kanamycin, and Streptomycin). **10a.** Surface model of receptor (WP\_025766410.1). **10b.** Pocket interaction for receptor (WP\_025766410.1) and ligand (Gentamicin). **10c.** Receptor (WP\_001643958.1) and ligand (Kanamycin) complex. **10d.** 2D model for receptor (WP\_001643958.1) **10e.** Pocket interaction for Receptor (WP\_000465133.1) and ligand (Streptomycin) **10f.** 2D Interaction Model for receptor (WP\_000465133.1) and ligand (Streptomycin).
