# Supplementary material for: Identification of Novel Antimicrobial Resistance Genes Using Machine Learning, Homology Modeling, and Molecular Docking
Source: MDPI journal article supplement (doi:10.3390/microorganisms10112102), 2022-10-23
Supplement: s1 [file s1]

(A) Receptor Ligand Complex, Doripenem

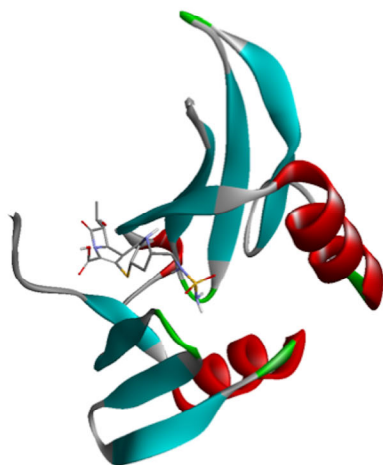

(B) Surface Model, Ertapenem

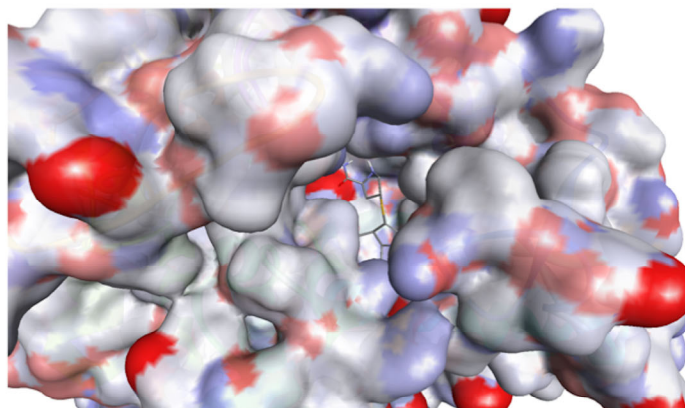

(C) Pocket Interaction, Imipenem

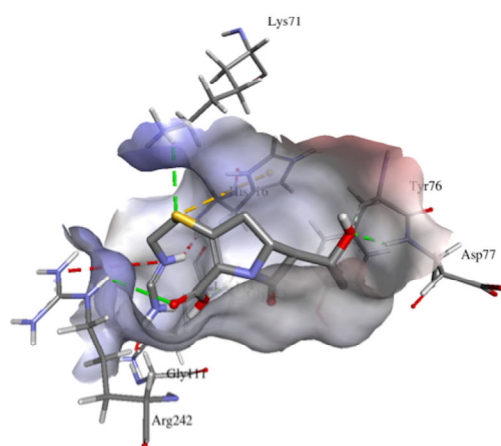

(D) 2D Interaction, Imipenem

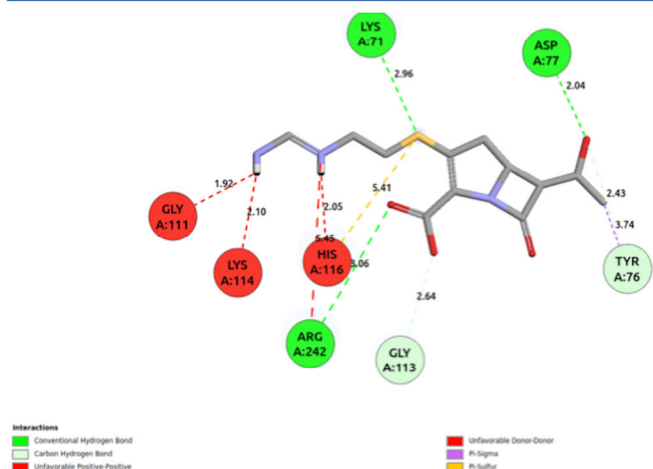

(E) Surface Model, Meropenem

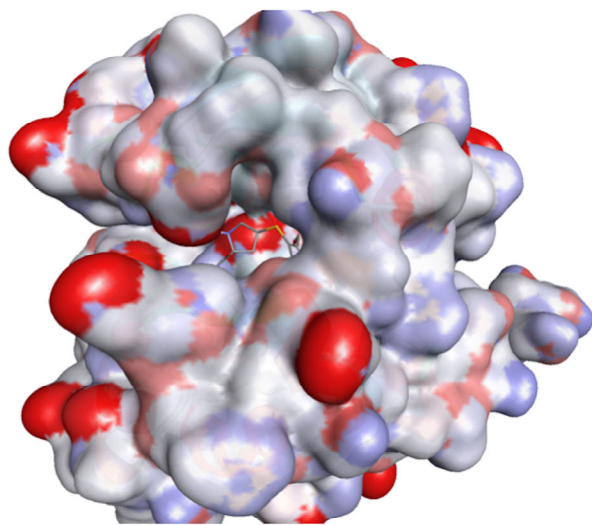

(F) 2D Interaction Model, Meorpenem

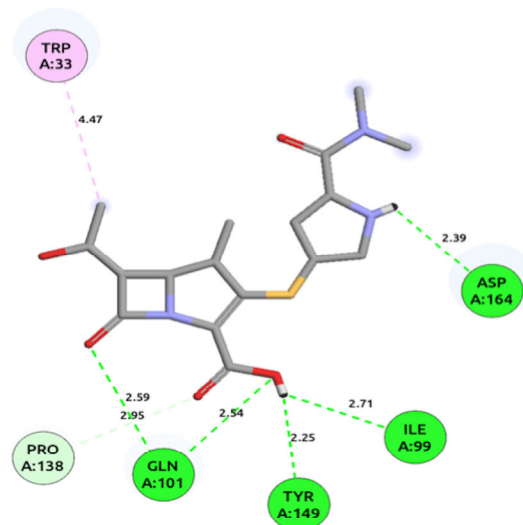

**Supplementary Figure 7.** Homology modeling docking of novel AMR genes predicted for *E. coli* and *Shigella* for antibiotics (Doripenem, Ertapenem, Imipenem, and Meropenem). **7a.** Receptor (WP\_004201167.1) and ligand (Doripenem) complex. **7b.** Surface model for receptor (WP\_001394742.1) and ligand (Ertapenem). **7c.** Pocket interaction of Receptor (WP\_004152394.1) and ligand (Imipenem) complex. **7d.** 2D Interaction model for receptor (WP\_004152394.1) and ligand (Imipenem). **7e.** Surface model for receptor (WP\_032488579.1.1) and ligand (Meropenem). **7f.** 2D Interaction Model for receptor (WP\_032488579.1.1) and ligand (Meropenem).
