# Supplementary material for: Identification of Novel Antimicrobial Resistance Genes Using Machine Learning, Homology Modeling, and Molecular Docking
Source: MDPI journal article supplement (doi:10.3390/microorganisms10112102), 2022-10-23
Supplement: s1 [file s1]

(A) Homology Model

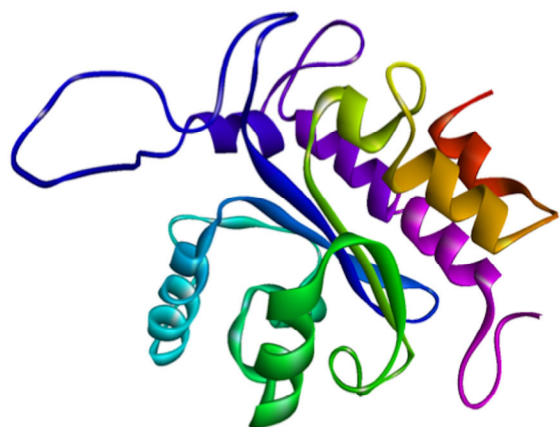

(B) Surface Model, Imipenem

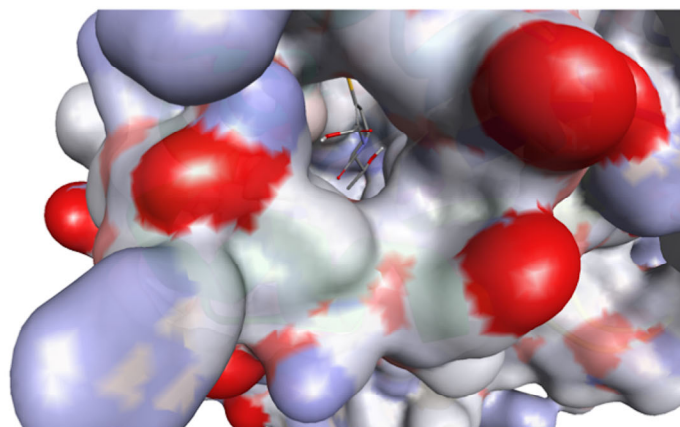

(C) Pocket Interaction, Imipenem

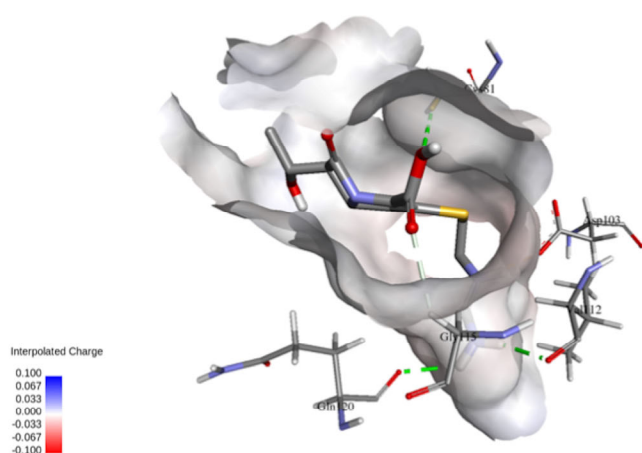

(D) Surface Model, Meropenem

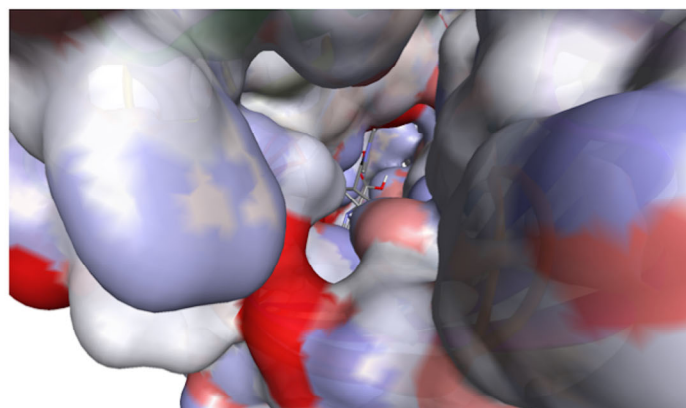

(E) Receptor Ligand Model, Meropenem

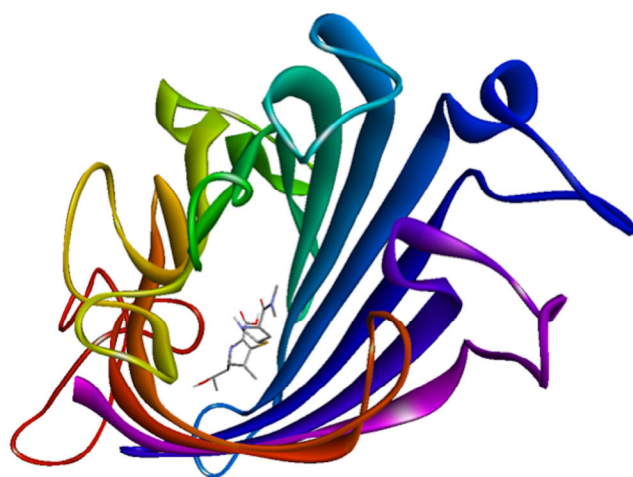

(F) 2D Interaction Model, Meorpenem

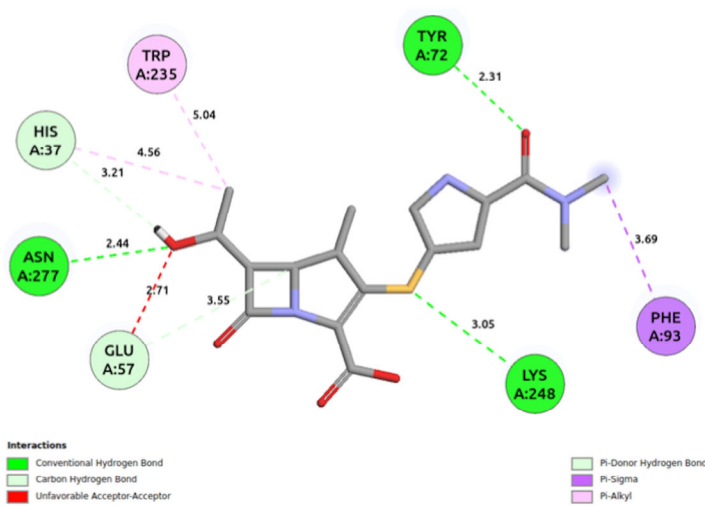

**Supplementary Figure 8.** Homology modeling docking of novel AMR genes predicted for *P. aeruginosa* for antibiotics (Imipenem and Meropenem). **8a.** Homology model of receptor (WP\_031628187.1). **8b.** Surface model for receptor (WP\_031628187.1) and ligand (Imipenem). **8c.** Pocket interaction of Receptor (WP\_031628187.1) and ligand (Imipenem) complex. **8d.** Surface model for receptor (WP\_023097121.1) and ligand (Imipenem). **8e.** Receptor (WP\_023097121.1) and ligand (Meropenem) complex. **8f.** 2D Interaction Model for receptor (WP\_023097121.1) and ligand (Meropenem).
