# Supplementary material for: Identification of Novel Antimicrobial Resistance Genes Using Machine Learning, Homology Modeling, and Molecular Docking
Source: MDPI journal article supplement (doi:10.3390/microorganisms10112102), 2022-10-23
Supplement: s1 [file s1]

(A) Surface Model

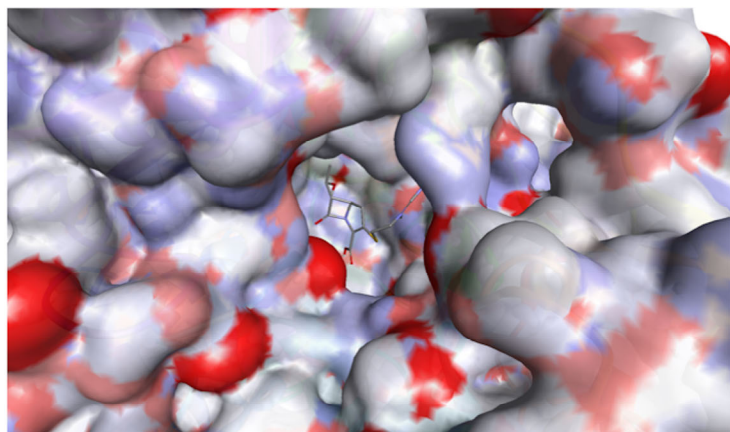

(B) Pocket Interaction Model, Imipenem

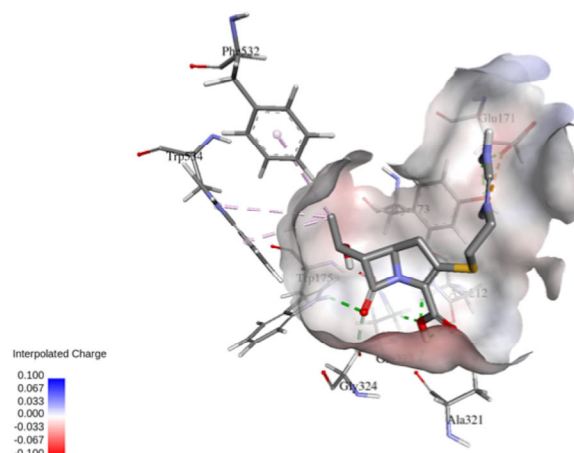

(C) 2D Interaction Model, Imipenem

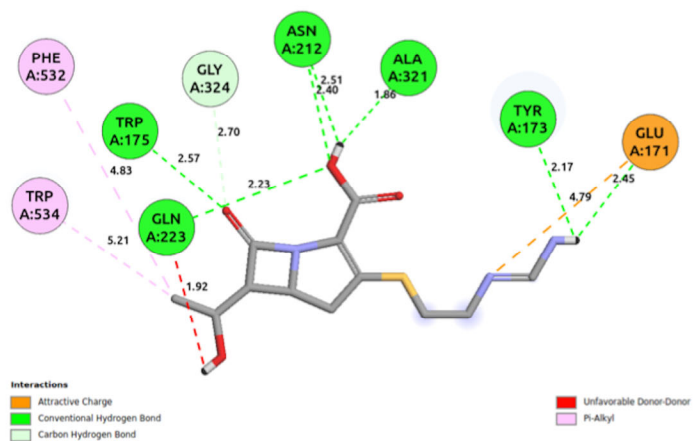

(D) Protein Ligand Complex, Meropenem

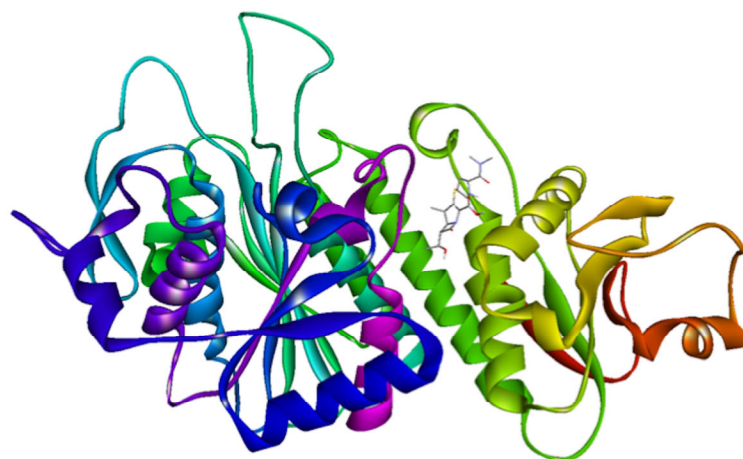

(E) Receptor ligand model, Meropenem

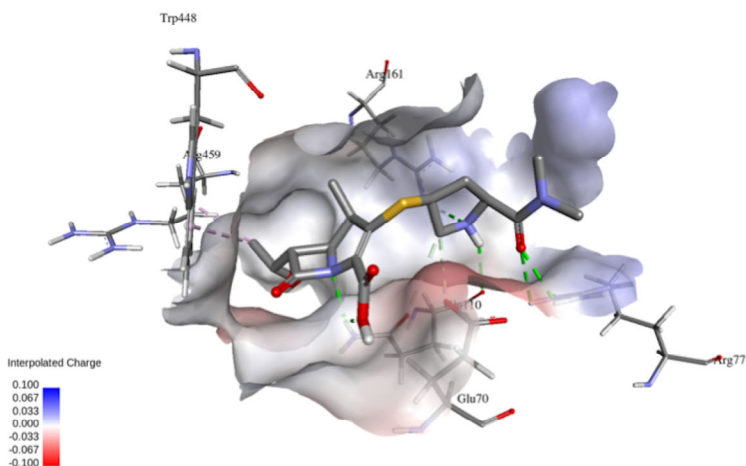

(F) 2D Interaction Model, Meorpenem

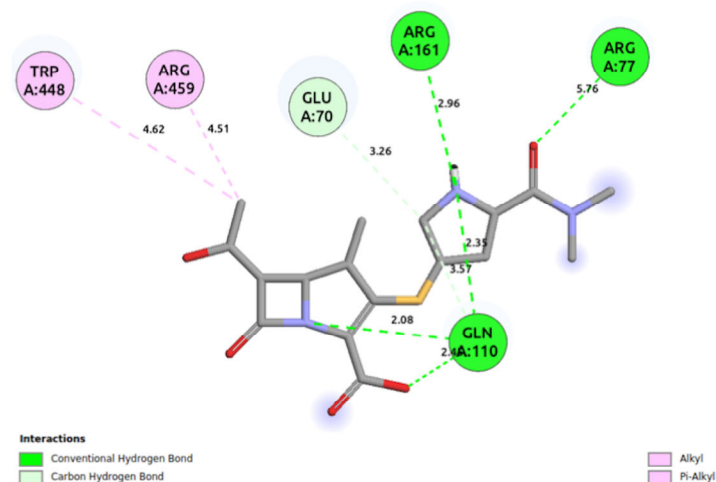

**Supplementary Figure 9.** Homology modeling docking of novel AMR genes predicted for *Enterobacter* for antibiotics (Imipenem and Meropenem). **9a.** Surface model of receptor (WP\_061096807.1). **9b.** Pocket interaction for receptor (WP\_061096807.1) and ligand (Imipenem). **9c.** 2D model for Receptor (WP\_061096807.1) and ligand (Imipenem) complex. **9d.** Receptor (WP\_023337592.1) and ligand (Meropenem) complex. **9e.** Pocket interaction for Receptor (WP\_023337592.1) and ligand (Meropenem) **9f.** 2D Interaction Model for receptor (WP\_023337592.1) and ligand (Meropenem).
